# Supplementary figures and images for: Prosthetic Stimulation of the Vestibular Nerve Can Evoke Robust Eye and Head Movements Despite Prior Labyrinthectomy
Source: PubMed Central journal article supplement — Otol Neurotol. 2023 Aug 28;44(10):1038–44. doi: 10.1097/MAO.0000000000004007 (PMC10662598; doi:10.1097/mao.0000000000004007), 2023-08-28

**A Left ear**

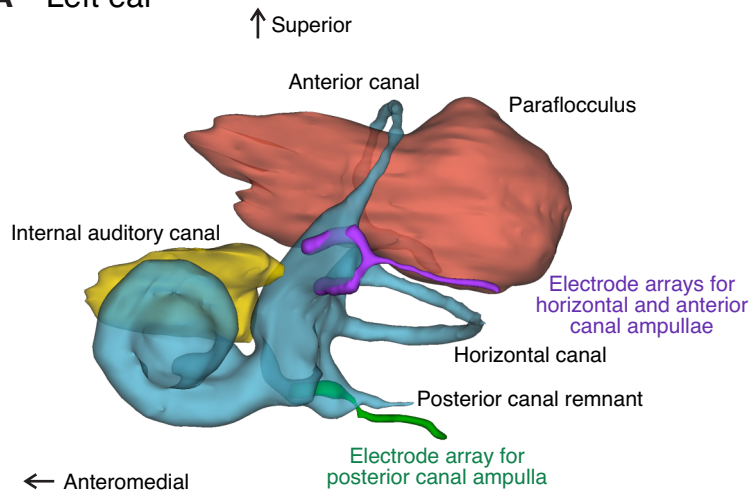

**B Right ear**

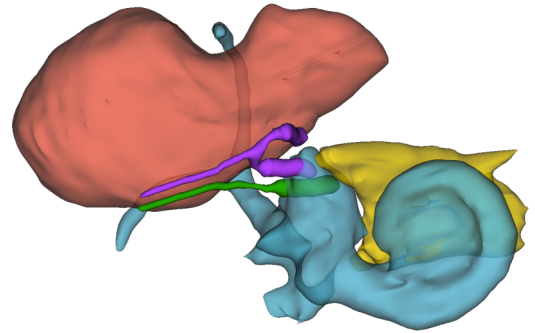

Supplement: on-44-1038-s002.pdf [file on-44-1038-s002.pdf]

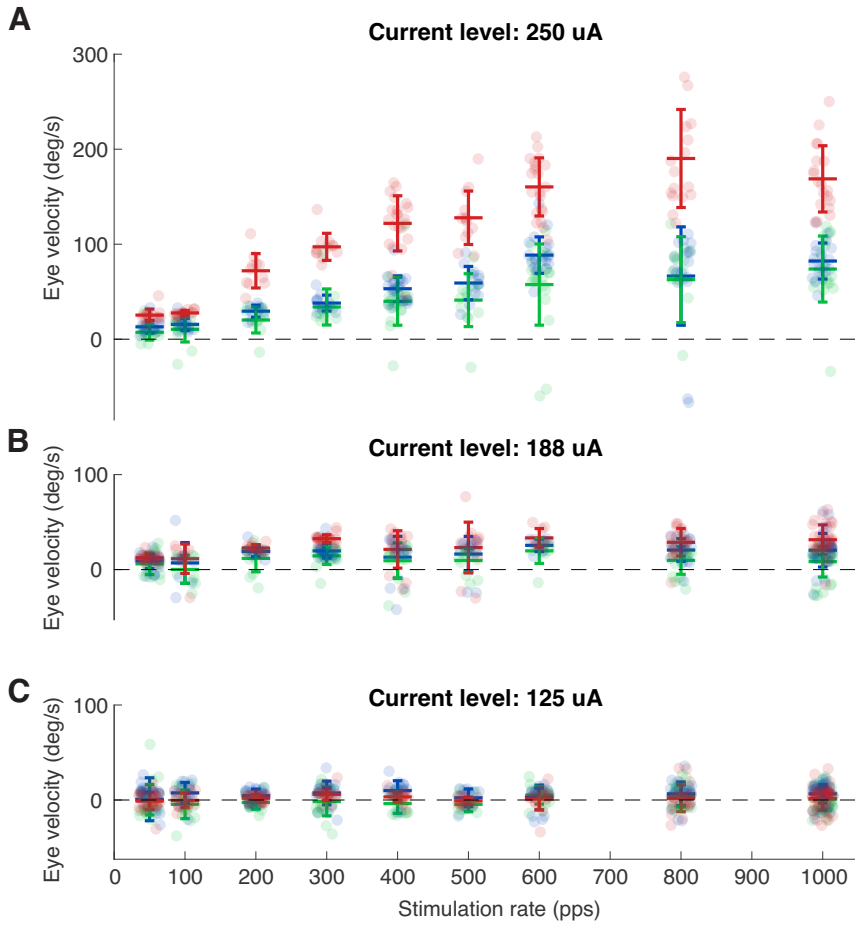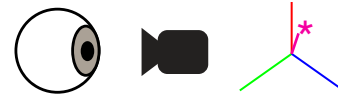

**D** Stimulation rate: 600 pps

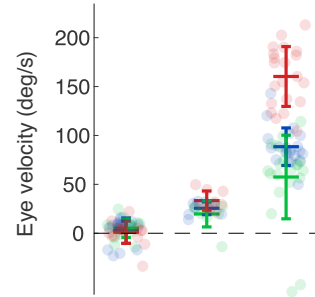

**E** Stimulation rate: 400 pps

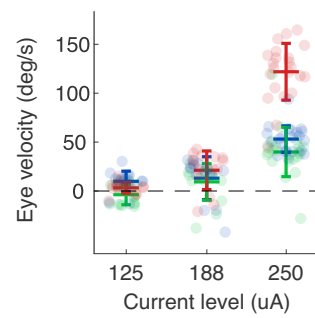

Supplement: on-44-1038-s003.pdf [file on-44-1038-s003.pdf]

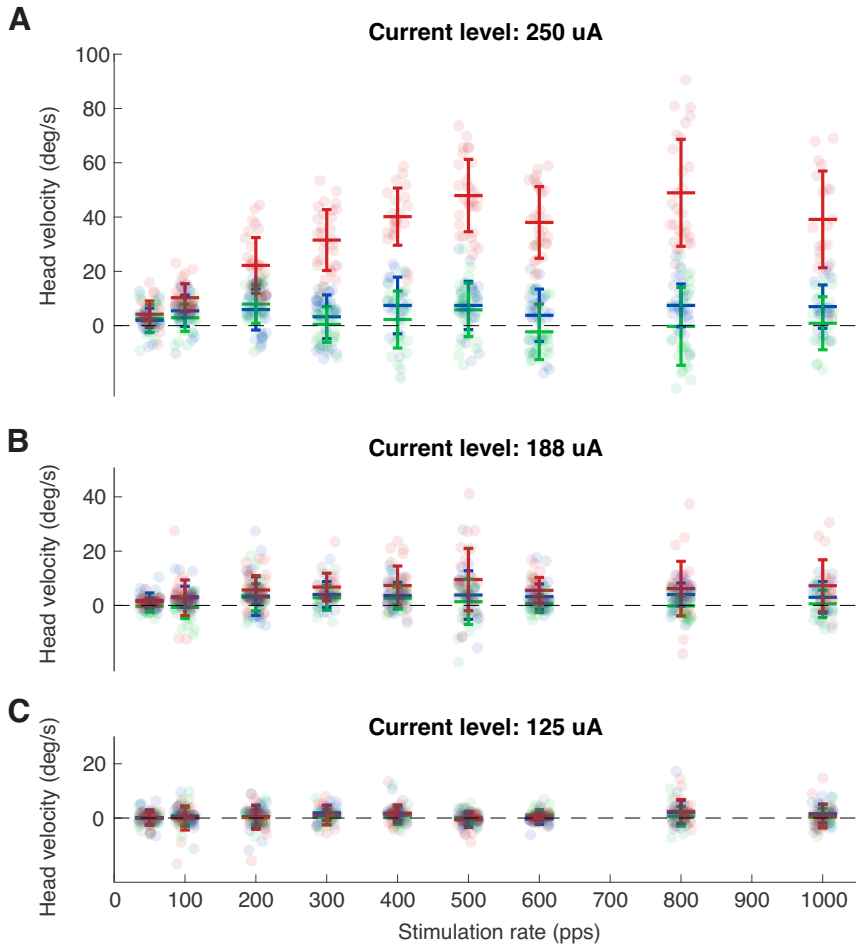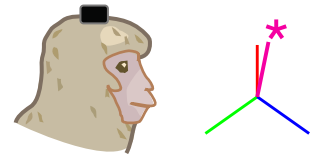

**D** Stimulation rate: 600 pps

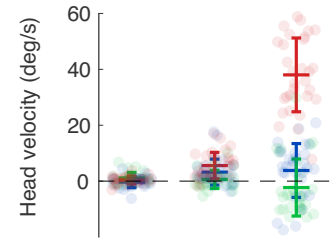

**E** Stimulation rate: 400 pps

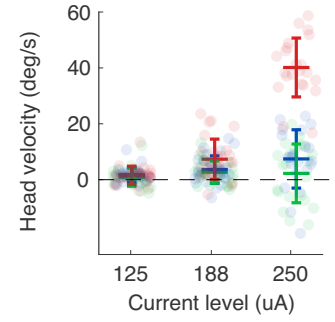

Supplement: on-44-1038-s004.pdf [file on-44-1038-s004.pdf]
